25 **Abstract**

26 Metastasis is the leading cause of mortality in breast cancer patients, with brain metastases becoming increasingly  
27 prevalent. Studying this disease is challenging due to the limited experimental models and methods available. Here,  
28 we used iron-based cellular MRI to track the fate of a mammary carcinoma cell line (MDA-MB-231-BR) *in vivo* to  
29 characterize the growth of brain metastases in the nude and severely immune-compromised NOD/SCID/IL2Rg<sup>-/-</sup>  
30 (NSG) mouse.

31 Nude and NSG mice received injections of iron-labeled MDA-MB-231-BR cells. Images were acquired with a 3T  
32 MR system and assessed for signal voids and metastases. The percentage of signal voids and the number and volume  
33 of metastases were quantified. *Ex vivo* imaging of the liver, histology, and immunofluorescence labeling was  
34 performed.

35 On day 0, iron-labeled cells were visualized as signal voids throughout the brain. The percentage of voids decreased  
36 significantly between day 0 and endpoint. At endpoint, there was no difference in the number of brain metastases or  
37 tumour burden in NSG mice compared to nudes. Tumour volumes in nude mice were significantly larger than in  
38 NSG mice. Body images indicated that the NSG mice had metastases in the liver, lungs, and lymph nodes.

39 Characterization of the NSG and nude mouse is necessary to study breast cancer brain metastasis *in vivo*. Here, we  
40 show that the 231BR cell line grew differently in NSG mice compared to nude mice. This work demonstrates the  
41 role that imaging can play toward credentialing these models that cannot be done with other *in vitro* or  
42 histopathologic methods alone.

43

## 44 **Background**

45 Breast cancer is a leading cause of death in women mainly due to the propensity of breast tumors to metastasize to  
46 regional and distant sites, such as the lymph node, lung, liver, bone and brain [1]. The incidence of brain metastases  
47 is increasing due to the introduction of more sensitive diagnostic methods and improved systemic therapies leading  
48 to improvements in extra-cranial control and survival [2-4]. Breast cancer is a disease with a number of subtypes and  
49 patients with metastatic ‘triple-negative’ breast cancer tend to develop brain metastasis at a high rate [5, 6]. For the  
50 HER2 amplified subtype, the frequency of brain metastasis has been reported to be as high as 50% [7].

51  
52 Once a metastatic cancer cell arrives in the brain one of three things can happen: (1) it may die, (2) it may proliferate  
53 to form micrometastases, or (3) it may remain viable but dormant (‘non-proliferative’) [8, 9] If the solitary cells  
54 proliferate to form micrometastases, they may again experience one of three fates: (1) they may die, (2) they may  
55 continue to proliferate and form macrometastases, or (3) they may persist as “dormant” micrometastases, where  
56 dormancy is defined as a balance between proliferation and apoptosis within the cell population such that there is no  
57 net growth [9, 10]. The factors that tip the balance between dormancy and proliferation are poorly understood. Both  
58 dormant single cells and dormant micrometastases are believed to be sources of cells that contribute to tumor  
59 recurrence [11]. Dormant cancer cells also present a substantial therapeutic problem; since they are quiescent, they  
60 are non-responsive to current therapies which target proliferating cells [8].

61  
62 Currently, only a handful of models specific to breast cancer brain metastasis have been described and even fewer  
63 allow for *in vivo* investigation of cancer cell dormancy. Both murine and human cancer cell lines have been  
64 developed to mimic as many steps in the metastatic cascade as possible. A well characterized murine breast cancer  
65 cell line is the 4T1-BR5 cell line, a highly tumorigenic and invasive cell line that has undergone multiple rounds of  
66 selection to preferentially grow in the mouse brain [12]. There are several advantages to using a murine breast  
67 cancer cell line to study brain metastasis, as growth and maintenance is easy and relatively inexpensive, and it can  
68 be grown in immune-competent mice, which is of particular interest for studying this disease in a way that  
69 recapitulates the tumor microenvironment [13].

70

71 A small number of human breast cancer brain metastatic cell lines have also been developed, including the  
72 commonly used MDA-MB-231BR (231BR), MDA-MB-231BR-HER2, MA11, JIMT1-BR3, SUM190-BR3 cell  
73 lines. The MDA-MB-231BR cell line has been particularly well characterized for studying the progression of brain  
74 metastases in nude mice. Nude mice are the most commonly used immune-deficient strain for models which use  
75 human cell lines. They have a genetic mutation that causes a deteriorated or absent thymus, resulting in a lack of T  
76 cells [14]. The 231BR cell line grows selectively in the brain of nude mice, without metastatic growth seen in other  
77 distant organs [15]. Human breast cancer cell lines are one of the most widely used models to study the metastatic  
78 growth of cancer *in vitro* and *in vivo*, as they have been used to provide extensive insight into the characteristics of  
79 human cells and can be used for high throughput screening of various drugs [16]. There are, however, significant  
80 limitations to using human and murine breast cancer cell lines, as the quick progression *in vivo* can limit  
81 opportunities for adequate therapeutic testing, and the growth of these cells *in vitro* prior to establishment in a mouse  
82 can cause changes in the genetic composition due to clonal selection [17]. Many groups have shown that these  
83 genetic changes result in these models failing to maintain tumor heterogeneity, which is now recognized as a critical  
84 element for developing personalized treatments [18-20]. Studying breast cancer with immunocompetent mice also  
85 has limitations, as tumor latency and growth can be variable and slow [21]. There is also increased difficulty in  
86 establishing human tumors successfully in these mice. Immune-compromised mice lack a comparable tumor  
87 microenvironment to clinical tumors and fail to provide a realistic result of interactions with the natural immune  
88 response, particularly in the case of studying anticancer therapeutics [22].  
89  
90 In more recent years, researchers have moved towards studying breast cancer and its subtypes with patient-derived  
91 xenografts (PDX), which allow for the growth of human primary breast cancer tissue that has been recently resected  
92 from consenting patients into immune-compromised rodents [23]. NOD/SCID/IL2Rg<sup>-/-</sup> (NSG) mice are the preferred  
93 strain of mice to engraft a PDX, as they are highly permissive to growing breast cancer metastasis, and resembles  
94 the metastatic pattern seen in human patients. NSG mice are the most immunodeficient mouse strains to date,  
95 lacking T cells, B cells, NK cells, and have defective macrophages and dendritic cells [24-26]. Even fewer PDX  
96 models have been developed specific to breast cancer brain metastasis, including the novel F2-7 and E22-1 PDX cell  
97 lines [27], as well as others who have established low passage PDX models of breast cancer brain metastasis and  
98 those that implant fresh tumor tissue directly into the rodent brain [28].

99 The D2.0R and related D2A1 mouse mammary tumor cells have been well characterized as model systems for  
100 tumor cell dormancy. In mice, D2.0R/R cells invade distant metastatic sites, remain as single quiescent cells for  
101 prolonged periods of time, and occasionally proliferate into metastatic tumors. D2A1/R cells, have a much shorter  
102 dormancy period before forming metastases in the lung, liver, and other organs [29]. A human breast cancer cell  
103 line, MCF-7 has also been studied to examine the mechanisms of dormancy, however it is poorly metastatic [30].

104 For all of these brain metastasis models – cancer cell growth, metastasis and dormancy are typically studied using  
105 methods such as histology, flow cytometry, immunohistochemistry, and fluorescent microscopy [31]. While these  
106 techniques provide useful information about molecular and cellular markers and morphology, they are limited to  
107 studying this disease after endpoint has been reached. There is a clear need to characterize brain metastatic models  
108 of breast cancer *in vivo*, which can be accomplished through use of imaging modalities and cell tracking techniques.

109  
110 Cellular magnetic resonance imaging (MRI) combines the ability to obtain high resolution MRI data with the use of  
111 iron oxide nanoparticles for labeling specific cells, thereby enhancing their detectability [32, 33]. The presence of  
112 the iron in cells causes a distortion in the magnetic field and leads to abnormal signal hypo-intensities in iron-  
113 sensitive images (T2\*-weighted images are most often used). Areas containing iron labeled cells therefore appear as  
114 regions of low signal intensity on MRI images, creating negative contrast [34]. We have previously shown that it is  
115 possible to use cellular MRI to track iron-labeled 231BR cancer cells in the nude mouse brain [35-37]. Proliferative  
116 cancer cells lose the iron label over time; as the cells divide the particles are apportioned to daughter cells and  
117 eventually some cells contain too little iron to be detectable by MRI. As brain metastases form, changes to the tissue  
118 result in the tumor appearing brighter than the surrounding brain in MRI. Nonproliferative cancer cells retain the  
119 iron particles and can be detected over long periods of time [37].

120  
121 In this study, we used these cellular MRI techniques to characterize and compare the growth of 231BR brain  
122 metastases and the persistence of iron-retaining cancer cells in nude and NSG mice. Our goal was to evaluate the  
123 NSG mouse as a model for breast cancer brain metastasis and dormancy.

## 124 125 **Methods**

### 126 **Cell Culture and MPIO Labeling Procedure**

127 Brain trophic human breast cancer cells (MDA-MB-231BR) expressing green fluorescent protein (GFP) were  
128 maintained with Dulbecco's modified Eagle's medium containing 10% fetal bovine serum (complete DMEM) at  
129 37°C and 5% CO<sub>2</sub>. 2x10<sup>6</sup> of these cells were seeded and allowed to adhere for 24 hours. To iron label these cells,  
130 cells were supplemented with 25 µg Fe/mL of micron-sized iron oxide particles (MPIO) (0.9 µm diameter, ~63%  
131 magnetite, labeled with Flash Red; Bangs Laboratory, Fishers, IN, USA) in 10mL of complete DMEM in a T75-cm<sup>2</sup>  
132 flask. Following this, cells were washed once with phosphate buffered solution (PBS) within the flask and  
133 trypsinized with 0.25% Trypsin-EDTA. After, cells were harvested and washed three additional times with PBS in  
134 the flask to thoroughly remove unincorporated MPIO prior to cell injections. Cell viability was assessed and  
135 calculated using the Trypan blue exclusion assay. To visualize MPIO labelling, labeled cells were affixed to a glass  
136 slide with a ThermoFisher Cytospin 4 cytocentrifuge and fixed with a Methanol/Acetic acid solution. Slides were  
137 then stained with a Perl's Prussian Blue (PPB) solution and counterstained with Nuclear Fast Red. Slides were  
138 dehydrated with increasing concentrations of ethanol, cleared with xylene, and coverslipped with a xylene-based  
139 mounting medium. These PPB-stained slides were examined to assess the localization of MPIO within the cell and  
140 to determine the labeling efficiency using a Zeiss AXIO Imager A1 Microscope (Zeiss Canada, Toronto, ON,  
141 Canada). Iron oxide nanoparticles appear dark blue, and cells appear light pink in colour.

142

### 143 **Animal Model and Work Flow**

144 All animals were cared for in accordance with the standards of the Canadian Council on Animal Care, under an  
145 approved protocol of the University of Western Ontario's Council on Animal Care and housed in a pathogen-free  
146 barrier facility. Female nude mice (nu/nu Foxn1, aged 6-8 weeks, from Charles River Laboratories, Wilmington,  
147 MA) and female NSG mice (NOD.*Cg-Prkdc<sup>scid</sup>Il2rg<sup>tm1Wjl</sup>/SzJ*, 6-8 weeks, Humanized Mouse and  
148 Xenotransplantation Facility, Robarts Research Institute, University of Western Ontario, London, ON) were first  
149 anesthetized with isoflurane (2% in 100% oxygen). Nude (n=10) and NSG mice (n=10) were then injected with a  
150 suspension of 1.5x10<sup>5</sup> MPIO-labeled MDA-MB-231BR/GFP+ cells in 100µL of sterile saline and 15% Vevo  
151 MicroMarker microbubble solution (FUJIFILM, VisualSonics Inc., Toronto, ON, Canada). Cell suspension was  
152 loaded into a 100µL Hamilton syringe with a 30G needle. Cells were administered by slow intracardiac injection  
153 into the beating left ventricle of the heart with ultrasound imaging guidance on a Vevo 2100 ultrasound system  
154 (FUJIFILM, VisualSonics Inc., Toronto, ON, Canada). Cancer cell arrest was evaluated with MRI on the day of the

155 injection (Day 0) and used to determine whether mice had a successful intracardiac injection. Absence of signal  
156 voids in the brain indicated an unsuccessful injection, resulting in exclusion from the remainder of the study. Nude  
157 mice with successful injections had MRI performed at day 21 and day 32 post-injection. NSG mice with successful  
158 injections had MRI performed at day 21 post-injection (Figure 1).  
159 Additionally, 1 nude mouse and 3 NSG mice received intracardiac injections with  $1.5 \times 10^5$  MPIO labeled MD-MB-  
160 231BR/GFP+ cells and intraperitoneal injections of 200 $\mu$ L of gadopentetate dimeglumine (Magnevist, Schering,  
161 US; 0.5 mmol/mL) on Day 0 to assess cancer cell arrest in the liver. These mice were sacrificed on Day 0 by  
162 isoflurane overdose approximately 40 minutes after intraperitoneal administration. These mice were then  
163 exsanguinated, and brains and livers were removed for *ex vivo* imaging.

164

### 165 **Magnetic Resonance Imaging**

166 All brain and body MRI examinations were acquired on a 3.0 Tesla GE MR750 clinical MR scanner (General  
167 Electric, Mississauga, ON, Canada) using a custom-built gradient coil (inner diameter = 17.5 cm, gradient strength =  
168 500 mT/m, and peak slew rate = 3000 T/m/s). Brain and *ex vivo* liver images used a custom-built solenoidal mouse  
169 brain radiofrequency (RF) coil. Body images were acquired using a 4.3 x 4.3 cm dual tuned  $^1\text{H}/^{19}\text{F}$  surface coil  
170 (Clinical MR Solutions, WI, USA), originally built for imaging small ROIs in humans. Mice were anesthetized with  
171 2% isoflurane in 100% oxygen administered through a nose cone. *In vivo* brain and body images were acquired  
172 using a 3D balanced steady-state free precession (bSSFP) sequence [Fast Imaging Employing Steady State  
173 Acquisition (FIESTA) on a GE system] that has been optimized for simultaneous detection of signal voids produced  
174 by iron-loaded cells and hyperintense metastases. This permitted the assessment of both cell arrest and retention as  
175 well as the number and volume of metastases throughout the mouse brain. Brain images for nude mice were  
176 acquired on day 0, day 21, and day 32. Brain imaging for NSG mice occurred on day 0 and day 21. Scanning  
177 parameters were as follows: resolution = 100 x 100 x 200  $\mu$ m, repetition time (TR) = 7 ms, echo time (TE) = 3.5 ms,  
178 bandwidth (BW) = 20.83kHz, flip angle (FA) = 35 degrees, signal averages = 2, phase cycles = 8, matrix = 150 x  
179 150, scan time = approximately 33 minutes per mouse. Body images were acquired on Day 20. Body imaging  
180 parameters were as follows: resolution = 200 x 200 x 200  $\mu$ m, repetition time (TR) = 4.7 ms, echo time (TE) = 2.3,  
181 bandwidth (BW) = +/-31.25 kHz, flip angle (FA) = 35 degrees, signal averages = 2, phase cycles = 8, matrix = 250  
182 x 250, scan time = approximately 20 minutes. *Ex vivo* liver imaging parameters were acquired using a spoiled

183 gradient echo sequence that also allows for the detection of signal voids throughout the liver. *Ex vivo* liver samples  
184 were immersed in tubes containing Fluorinert™ FC-40 Electronic Liquid (3M, St. Paul's, MN, USA), a  
185 fluorocarbon liquid which produces a black background in proton images. Images were taken of *ex vivo* livers  
186 acquired on day 0 for both strains, day 21 for the NSG mouse, and day 32 for the nude mouse. The scanning  
187 parameters for *ex vivo* liver images were as follows: resolution = 100 x 100 x 200  $\mu$ m, repetition time (TR) = 43 ms,  
188 echo time (TE) 4.844 ms, bandwidth (BW) = 31.25kHz, flip angle (FA) = 60 degrees, signal averages = 1, phase  
189 cycles = 8, matrix = 250 x 250, scan time = approximately 23 minutes.

190

### 191 **Image Analysis**

192 Images were analyzed using open-source OsiriX image software (Pixmeo, SARL, Bernex, Switzerland), version  
193 10.0.4 and Horos image software, version 3.3.5. Brain images were evaluated for successful cell delivery by  
194 assessment of signal voids on day 0. To quantify cancer cell arrest throughout the brain, the number of black pixels  
195 within the total brain volume was determined from day 0 MRI images. The brain was manually segmented as a  
196 region of interest and then a threshold value was determined based on the mean pixel intensity value of a  
197 representative signal void within the brain region  $\pm$  2 standard deviations. The total number of black pixels under  
198 this threshold value within the entire brain volume signal was obtained from a pixel intensity histogram. To quantify  
199 brain metastases at day 21 and day 32, tumors were counted in all image slices by a single observer. Each tumor was  
200 manually segmented, and the tumor volumes were reconstructed using the OsiriX and Horos volume algorithm. To  
201 calculate brain tumor burden at day 21 and day 32, an ROI was drawn around the outline of the brain in each slice,  
202 and a 3D reconstruction using the OsiriX and Horos volume algorithm provided a quantification of the total brain  
203 volume. The total volume of all segmented tumors was then determined by adding each individual tumor volume  
204 measurement and calculating the percentage of the total brain volume occupied by tumors. Body images were  
205 qualitatively assessed for the presence of metastases in the liver, lung, and lymph nodes. All quantitative values  
206 were presented as the mean  $\pm$  standard error. Statistical analysis was performed using Welch's *t* tests on GraphPad  
207 Prism version 8 software (GraphPad, San Diego, CA).

208

### 209 **Histology and Immunohistochemistry**



210 At each strain's respective endpoints, mice were euthanized by isoflurane overdose and perfused with 4%  
211 paraformaldehyde. Brains were removed and placed into paraformaldehyde for another 24 hours. Fixed brains were  
212 processed, paraffin embedded and then cut into 6 or 8 um sections. Sliced sections were deparaffinized and stained  
213 with either hematoxylin and eosin (H&E) or immunofluorescently labelled for Ki67.

214

#### 215 **Hematoxylin and eosin (H&E) staining**

216 Sections were washed briefly in distilled water, stained in Harris hematoxylin solution for 5 minutes and  
217 differentiated in 1% acid alcohol for 30 seconds. After washing in 0.2% ammonia for 5 minutes, sections were  
218 counterstained in eosin-phloxine solution for 30 seconds; dehydrated through 95% alcohol, 2 changes of absolute  
219 alcohol, and 5 minutes each. Sections were then dehydrated and cleared through 95% ethyl alcohol, absolute alcohol  
220 and xylene, and mounted with resinous medium.

221

#### 222 **Immunofluorescent labelling**

223 Ki-67 immunostaining was performed using a rat anti-Ki-67 antibody (1:400 dilution; Catalog #14-5698-82,  
224 Invitrogen). All sections were permeabilized with 0.2% Triton X-100 in PBS for 15 minutes and non-specific  
225 protein binding was then blocked by incubation in a commercial blocking agent (ab156024, Abcam) for 1 hour at  
226 room temperature. Sections were then incubated with the Ki-67 primary antibody in commercial antibody dilutant  
227 (ab64211, Abcam) at room temperature for 1 hour. Negative controls (without addition of primary antibody) were  
228 performed on adjacent sections. Unbound primary antibody was washed away through three 5-minute exchanges of  
229 1xPBS. Sections were then incubated with an anti-rat Alexa Fluor-488 secondary antibody (1:300 dilution; Catalog  
230 #A-11006, Invitrogen) for 1 hour. Unbound secondary antibody was washed away through three 5-minute  
231 exchanges of 1xPBS. Finally, nuclei were counterstained with Hoechst 33258 for 5 minutes and rinsed sections  
232 cover slipped for microscopic examination.

233

## 234 **Results**

### 235 ***In Vitro* Studies**

#### 236 ***Cell Labelling***

237 MDA-MB-231BR cells were efficiently labeled with MPIO, as demonstrated by the Perl's Prussian blue staining of  
238 cells shown in Figure 2a; cancer cells appear pink, and the intracellular iron is blue. Labelling efficiency of  
239  $96.33 \pm 1.20\%$  was achieved with  $97.33 \pm 0.88\%$  cell viability.

240

## 241 ***In Vivo Studies***

### 242 ***Experimental Endpoint***

243 In our experience, intracardiac injection of  $1.5 \times 10^5$  231BR cells in nude mice results in brain tumor burden,  
244 significant weight loss and neurological impairments which leads to a requirement for euthanasia at 28-34 days post  
245 injection. In this study the nude mice reached experimental endpoint on day 32. In contrast, NSG mice could only  
246 be studied until day 21, at which time they had reached a weight loss greater than 15% of their body weight,  
247 resulting in extreme cachexia and anorexia. Additionally, these mice showed severe signs of neurological  
248 impairment, resulting in the inability to perform normal functions and exhibiting paralysis and circling. Post-mortem  
249 examination also revealed significant liver tumor burden, which also contributed to the early, unexpected endpoint.

250

### 251 ***Imaging Cell Arrest and Retention***

252 On day 0, bSSFP brain images confirmed the successful intracardiac injection of MPIO-labeled cancer cells in all  
253 mice; iron-labeled cancer cells appeared as distinct regions of signal void throughout the brain due to their initial  
254 arrest in brain vasculature (Figure 2b). Figure 3a shows representative day 0 images for each mouse strain. When  
255 quantifying the percentage of the brain consisting of black signal voids, approximately  $4.69\% \pm 1.71$  and  $6.26\% \pm 1.86$   
256 of the brains of NSG and nude mice contained arrested cancer cells, respectively. At each strain's endpoint, the  
257 number of black pixels was again determined, with percentages significantly reduced to approximately  $1.89\% \pm 0.57$   
258 in NSG mice (day 21) and  $2.45\% \pm 0.48$  in nude mice (day 32). While the number of arrested cancer cells  
259 significantly differs from day 0 to endpoint for both NSG ( $p = 0.03$ ) and nude mice ( $p = 0.02$ ), there was no  
260 significant differences between strains at each time point (Figure 3b).

261

### 262 ***Day 21 MRI***

263 On day 21, metastases were detectable in bSSFP brain images as regions of signal hyperintensity in both strains of  
264 mice (Figure 4a). On day 21, the mean number of MRI-detectable metastases was significantly higher in NSG mice

265 (63.70±5.37) compared to nude mice (15.33±4.29) (Figure 4b). While the nude mice had fewer tumors, they were  
266 significantly larger. The mean volume of tumors in nude mice was 0.06 mm<sup>3</sup>±0.01, compared to 0.04 mm<sup>3</sup>±0.003  
267 for NSG mice (Figure 4c). This mean volume was based on a total number of 637 tumors in all NSG mice and 72  
268 tumors counted in all nude mice. At day 21, the mean tumor burden was significantly higher for NSG mice (2.39  
269 mm<sup>3</sup>±0.18) compared to nude mice (0.82 mm<sup>3</sup>±0.35) (Figure 4D).

270

### 271 ***Day 32 MRI***

272 Nude mice were followed out their endpoint of day 32 and imaging analysis was compared to the endpoint data for  
273 the NSG mice (Figure 5). The mean number and volume of brain metastases in nude mice increased between days  
274 21 and 32. On day 32 the mean number of brain metastases in nude mice was 39.60±10.99. When comparing the  
275 mean number of metastases for NSG and nude mice at their respective endpoints there was no longer a significant  
276 difference (p = 0.07) (Figure 5b).

277 On day 32 the mean volume of brain metastases in nude mice was 0.32±0.23 mm<sup>3</sup>, compared to 0.04±0.03 mm<sup>3</sup> on  
278 day 21. This was significantly higher (p = <0.0001) than the mean volume of brain metastases at the NSG endpoint  
279 (Figure 5c). Accordingly, nude mice had significantly more tumor burden than NSG mice (Figure 4d), which was a  
280 reversal from the previous timepoint at day 21. Due to the earlier endpoint of NSG mice but lesser brain tumor  
281 burden, body MRI was acquired for an NSG mouse at day 20. Notably, there was significant tumor burden detected  
282 by MRI within the liver, lungs (Figure 6A), and lymph nodes (Figure 6b) of the NSG mice. Nude mice had no MRI-  
283 detectable tumors within the body outside the brain (Figure 6c).

284

### 285 ***Ex Vivo Liver MRI***

286 Discrete signal voids were visible in the day 0 images of *ex vivo* livers from each strain of mouse, suggesting the  
287 arrest of iron labeled 231BR cells throughout the liver (Figure 6d,e). *Ex vivo* liver mages obtained from mice at  
288 endpoint showed numerous regions of abnormal high signal intensity associated with liver metastases, confirming  
289 the *in vivo* image results (Figure 6f). A photo of a representative liver sample clearly shows the liver metastases on  
290 the surface (Figure 6h). No regions of abnormal signal hyperintensity were observed in *ex vivo* images of the nude  
291 mouse liver (6g). H&E stained sections of the liver tissue from NSG mice confirmed the presence of metastases (6i)  
292 and ki67 staining showed that they were highly proliferative (6j).

293 **Discussion**

294 This work demonstrates for the first time the use of *in vivo* longitudinal MRI based cell tracking to compare murine  
295 models of brain metastatic breast cancer. We show that there are significant differences in tumor progression for  
296 231BR cells in NSG versus nude mice. While the initial arrest, clearance, and retention of iron-labeled cells was  
297 similar, brain metastases developed more quickly in NSG mice and NSG mice developed substantial body tumor  
298 burden, particularly in the liver, leading to an earlier endpoint.

299  
300 The 231BR cell line was developed by Yoneda et al [15]. and is a brain-colonizing subline of the metastatic triple-  
301 negative MDA-MB-231 human breast cancer cell line, which was isolated by six repeated cycles of intra-cardiac  
302 injection and harvesting from brain metastases grown in nude mice. In our lab, the intra-cardiac injections are  
303 performed using ultrasound (US) guidance. Of note, was our observation by US of a thicker heart muscle  
304 surrounding the left ventricle of the NSG mouse. This anatomical observation made intracardiac injections more  
305 difficult, as the ventricular space appeared smaller with US. The observation of signal voids in brain images  
306 acquired on day 0 was used to identify successful delivery of cells to the brain. In this study, all mice imaged had  
307 successful injections and were included in the study. Delivery of cells to a specific organ is related to the cardiac  
308 output that is delivered to that organ. The cardiac output to the brain of a mouse is ~9.5% [38]. Here, we injected  
309 150,000 cells into the left ventricle of the heart, and therefore we can expect ~14,250 cells to be successfully  
310 delivered to the brain. Only a percentage of these cells will arrest; previous studies, however, have shown that less  
311 than 1% of cells are retained in the microcirculation of the brain after 2 hours post-injection [38]. In previous  
312 studies, we have used PPB staining and fluorescence microscopy to demonstrate that these signal voids correspond  
313 to the presence of iron-labeled cells in the brain [35, 36].

314  
315 The size of the signal void created by iron-labeled cells is much larger than the actual cell size, due to what is known  
316 as the blooming effect. The blooming effect is a susceptibility artifact that occurs as a result of the iron oxide  
317 nanoparticle, which causes a local magnetic field inhomogeneity [34]. We have previously shown that we can detect  
318 single iron-labeled cells arrested in the mouse brain using cellular MRI [35, 39, 40]. Our image showed that the  
319 number of signal voids in the brain was similar for nude and NSG mice on day 0 and at endpoint. While we  
320 acknowledge that there is potential for immune cell uptake of the iron oxide nanoparticles that may be released by

321 dead cancer cells, we believe that the majority of the signal voids that remain present are live cancer cells retaining  
322 iron. For example, in Parkins et al. [39] we investigated this mouse model using luciferase-positive 231BR cells and  
323 measured a strong correlation on day 0 between the number of signal voids detected in day 0 brain MR images and  
324 the brain signal measured in bioluminescence images, which is only detected from viable cells, providing evidence  
325 that signal voids represent live iron-labeled cells. In Hamilton et al. [41] we used fluorescence activated cell sorting  
326 (FACS) to successfully isolate live 231BR cells that were GFP-positive and labeled with red fluorescent (Flash Red)  
327 MPIO from the brains of mice. The GFP+ Flash Red+ cells were collected and expanded *in vitro*. The majority  
328 (~90%) of cells adhered to tissue culture plastic and successfully expanded, displaying the same cell morphology as  
329 the original cultured 231BR cells. This provide additional support for our claim that signal voids in MRI represent  
330 viable iron-positive cancer cells.

331 Our previous work has shown that the number of signal voids detected in MRI of the brain decreases over the course  
332 of the experiment, from day 0 to day 8, which is expected as the large majority of cancer cells that arrest in the brain  
333 do not survive and are cleared with time [39]. The signal voids which do persist in the brain over time are thought to  
334 represent iron-retaining, non-proliferative or dormant cancer cells. These cells have been shown to contribute to  
335 tumor recurrence [41]. It appears that both nude and NSG mice are capable of clearing dead cells from the brain.

336  
337 3D MRI of the entire mouse brain at high resolution allowed us to view brain metastases in all 3 orientations and to  
338 digitally re-slice images to carefully interrogate image data. We counted and measured the volume of all MRI-  
339 detectable brain metastases. Brain metastases developed more quickly in NSG mice. At day 21 post cell injection  
340 NSG mice had more than 3 times the number of brain metastases. The NK cells and the remaining innate immune  
341 cells in nude mice likely contribute to the reduced tumor growth at this timepoint. This finding is in agreement with  
342 the results of other groups that show that more immune compromised mouse models are more permissive for tumor  
343 growth and metastasis [42-45]. Puchalapalli et al. [45] have previously reported an increase in the metastatic burden  
344 (in liver, lungs, brain and bones) in NSG compared to nude mice that were injected with the parental 231 breast  
345 cancer cell line in an intracardiac experimental metastasis model. In this study, metastases in each organ were  
346 enumerated from *ex vivo* fluorescence microscopy images. Our work demonstrates the advantages of using *in vivo*  
347 and longitudinal 3D MRI for the accounting of metastases in the whole brain.

348

349 NSG mice had to be euthanized at day 21/22. This was unexpected, as volumetric analyses of the tumor burden in  
350 the brain at this timepoint compared to the tumor burden of the nude mice at their endpoint of day 32 indicated that  
351 the NSG mice had lesser tumor burden in the brain. This suggested that there was a possibility of metastases to have  
352 occurred elsewhere in the body that could be contributing to a greater disease burden. Mouse body MRI confirmed  
353 tumors in the liver, lungs, and lymph nodes.

354  
355 Nude mice were imaged at a third timepoint. On day 32 the number of brain metastases in nude mice was similar to  
356 the number of brain metastases in NSG mice on day 21. The mean volume of the brain metastases in the nude mice  
357 on day 32 was more than 3 times greater than those in NSG mice at day 21, having had more time to develop.  
358 Overall, the brain tumor burden at necessary endpoint was significantly greater in nude mice.

359  
360 *Ex vivo* images of livers removed on the day of the intracardiac injection of iron labeled 231BR cells revealed  
361 numerous signal voids in all lobes of the liver in both strains of mice indicating that there was similar cancer cell  
362 arrest for both strains at this timepoint. We did not do a quantitative analysis of liver signal voids, however, in a  
363 previous study where we injected MPIO-labeled melanoma cells via the mesenteric vein, mouse livers were imaged  
364 *ex vivo* by MRI and the signal void area was shown to correlate with the number of cells injected [46]. *Ex vivo*  
365 images of livers removed at endpoint showed that numerous metastases formed in NSG mice while no liver  
366 metastases could be detected in nude mice.

367 The 231BR cell line was developed to selectively grow distant metastases in the brains of nude mice, and so the  
368 proliferation of metastases of this cell line in the liver demonstrates the loss of selectivity to the brain in the NSG  
369 mouse.

370

## 371 **Conclusion**

372 In summary, high resolution cellular MRI allowed us to characterize the 231BR cell line in both the NSG and nude  
373 mouse models. We found marked differences in tumor incidence, volumes, and body tumor burden between strains.  
374 Our *in vivo* comprehensive analysis of cancer cell arrest, clearance, and tumor progression is important for  
375 understanding the metastatic cascade of a model of breast cancer brain metastasis that can be challenging to obtain  
376 with *in vitro* or *ex vivo* methods alone.

377

378 **List of Abbreviations**

| 379 | <b>Abbreviations</b> | <b>Full Form</b>                                |
|-----|----------------------|-------------------------------------------------|
| 380 | bSSFP                | balanced steady-state free precession           |
| 381 | BW                   | bandwidth                                       |
| 382 | DMEM                 | Dulbecco's modified Eagle's medium              |
| 383 | FA                   | flip angle                                      |
| 384 | FACS                 | fluorescence activated cell sorting             |
| 385 | FIESTA               | Fast Imaging Employing Steady State Acquisition |
| 386 | GFP                  | green fluorescent protein                       |
| 387 | H&E                  | hematoxylin and eosin                           |
| 388 | MPIO                 | micron-sized iron oxide particles               |
| 389 | MRI                  | magnetic resonance imaging                      |
| 390 | NSG                  | NOD/SCID/IL2rg <sup>-/-</sup>                   |
| 391 | PBS                  | Perl's Prussian Blue                            |
| 392 | PDX                  | patient-derived xenograft                       |
| 393 | RF                   | radiofrequency                                  |
| 394 | TE                   | echo time                                       |
| 395 | TR                   | repetition time                                 |
| 396 | US                   | ultrasound                                      |
| 397 | 231BR                | MDA-MB-231BR                                    |
| 398 |                      |                                                 |

399 **Declarations**

400 **Funding**

401 This study was supported by the Canadian Institute for Health Research (P.J. Foster) and the Breast Cancer Society  
402 of Canada (N.N. Knier).

403

404 **Conflicts of interest/Competing interests**

405 The authors declare that they have no competing interests.

406

407 **Ethics approval**

408 Animals were cared for in accordance with the standards of the Canadian Council on Animal

409 Care, and under an approved protocol of the Western University's Council on Animal Care (2018-135).

410

411 **Consent to participate**

412 Not applicable

413

414 **Consent for publication**

415 Not applicable

416

417 **Availability of data and materials**

418 The datasets used and/or analysed during the current study are available from the corresponding author on

419 reasonable request.

420

421 **Code availability**

422 Not applicable

423

424 **Author's Contributions**

425 P.J.F. designed the experiments. N.N.K, P.J.F, and A.M.H conducted the experiments. N.N.K. analyzed the data.

426 N.N.K. and P.J.F. wrote the main manuscript text. All authors reviewed the manuscript.



427 **Acknowledgements**

428 The authors would like to thank Ashley V. Makela for assisting with mouse injections for this study and the

429 Canadian Institute for Health Research and the Breast Cancer Society of Canada for their funding.

430

431 **References**

432

- 433 1. Patanaphan V, Salazar OM, Risco R. Breast cancer: metastatic patterns and their prognosis. *Southern*  
434 *medical journal*. 1988;81(9):1109–1112.
- 435 2. Gavrilovic IT, Posner JB. Brain metastases: epidemiology and pathophysiology. *Journal of neuro-*  
436 *oncology*. 2005;75(1):5–14.
- 437 3. Nayak L, Lee EQ, Wen PY. Epidemiology of brain metastases. *Current oncology reports*. 2012;14(1):48–  
438 54.
- 439 4. Tabouret E, Chinot O, Metellus P, Tallet A, Viens P, Goncalves A. Recent trends in epidemiology of brain  
440 metastases: an overview. *Anticancer research*. 2012;32(11):4655–4662.
- 441 5. Anders C, Carey LA. Understanding and treating triple-negative breast cancer. *Oncology (Williston Park,*  
442 *NY)*. 2008;22(11):1233.
- 443 6. Heitz F, Harter P, Lueck H-J, Fissler-Eckhoff A, Lorenz-Salehi F, Scheil-Bertram S, et al. Triple-negative  
444 and HER2-overexpressing breast cancers exhibit an elevated risk and an earlier occurrence of cerebral  
445 metastases. *European journal of cancer*. 2009;45(16):2792–2798.
- 446 7. Loibl S, Gianni L. HER2-positive breast cancer. *The Lancet*. 2017;389(10087):2415–2429.
- 447 8. Chambers AF, Groom AC, MacDonald IC. Dissemination and growth of cancer cells in metastatic sites.  
448 *Nature Reviews Cancer*. 2002;2(8):563–572.
- 449 9. Goss PE, Chambers AF. Does tumour dormancy offer a therapeutic target? *Nature Reviews Cancer*.  
450 2010;10(12):871–877.
- 451 10. Fehm T, Mueller V, Marches R, Klein G, Gueckel B, Neubauer H, et al. Tumor cell dormancy:  
452 implications for the biology and treatment of breast cancer. *Apmis*. 2008;116(7–8):742–753.
- 453 11. Brackstone M, Townson JL, Chambers AF. Tumour dormancy in breast cancer: an update. *Breast Cancer*  
454 *Research*. 2007;9(3):208.
- 455 12. Lockman PR, Mittapalli RK, Taskar KS, Rudraraju V, Gril B, Bohn KA, et al. Heterogeneous blood–tumor  
456 barrier permeability determines drug efficacy in experimental brain metastases of breast cancer. *Clinical*  
457 *cancer research*. 2010;16(23):5664–5678.
- 458 13. Burdall SE, Hanby AM, Lansdown MR, Speirs V. Breast cancer cell lines: friend or foe? *Breast cancer*  
459 *research*. 2003;5(2):89.
- 460 14. Pelleitier M, Montplaisir S. The nude mouse: a model of deficient T-cell function. *Methods and*  
461 *achievements in experimental pathology*. 1975;7:149–166.
- 462 15. Yoneda T, Williams PJ, Hiraga T, Niewolna M, Nishimura R. A bone-seeking clone exhibits different  
463 biological properties from the MDA-MB-231 parental human breast cancer cells and a brain-seeking clone  
464 in vivo and in vitro. *Journal of bone and mineral research*. 2001;16(8):1486–1495.
- 465 16. Kumar S, Bajaj S, Bodla RB. Preclinical screening methods in cancer. *Indian journal of pharmacology*.  
466 2016;48(5):481.
- 467 17. Gillet J-P, Varma S, Gottesman MM. The clinical relevance of cancer cell lines. *Journal of the National*  
468 *Cancer Institute*. 2013;105(7):452–458.
- 469
- 470
- 471
- 472
- 473
- 474
- 475
- 476
- 477
- 478
- 479
- 480
- 481
- 482
- 483
- 484
- 485

- 486 18. Siolas D, Hannon GJ. Patient-derived tumor xenografts: transforming clinical samples into mouse models.  
487 Cancer research. 2013;73(17):5315–5319.  
488
- 489 19. Sulaiman A, Wang L. Bridging the divide: preclinical research discrepancies between triple-negative breast  
490 cancer cell lines and patient tumors. *Oncotarget*. 2017;8(68):113269.  
491
- 492 20. Weeber F, Ooft SN, Dijkstra KK, Voest EE. Tumor organoids as a pre-clinical cancer model for drug  
493 discovery. *Cell chemical biology*. 2017;24(9):1092–1100.  
494
- 495 21. Ruggeri BA, Camp F, Miknyoczki S. Animal models of disease: pre-clinical animal models of cancer and  
496 their applications and utility in drug discovery. *Biochemical pharmacology*. 2014;87(1):150–161.  
497
- 498 22. Sharpless NE, DePinho RA. The mighty mouse: genetically engineered mouse models in cancer drug  
499 development. *Nature reviews Drug discovery*. 2006;5(9):741–754.  
500
- 501 23. Dobrolecki LE, Airhart SD, Alferez DG, Aparicio S, Behbod F, Bentires-Alj M, et al. Patient-derived  
502 xenograft (PDX) models in basic and translational breast cancer research. *Cancer and Metastasis Reviews*.  
503 2016;35(4):547–573.  
504
- 505 24. Whittle JR, Lewis MT, Lindeman GJ, Visvader JE. Patient-derived xenograft models of breast cancer and  
506 their predictive power. *Breast cancer research*. 2015;17(1):17.  
507
- 508 25. Jung J, Seol HS, Chang S. The generation and application of patient-derived xenograft model for cancer  
509 research. *Cancer research and treatment: official journal of Korean Cancer Association*. 2018;50(1):1.  
510
- 511 26. Yu J, Qin B, Moyer AM, Sinnwell JP, Thompson KJ, Copland JA, et al. Establishing and characterizing  
512 patient-derived xenografts using pre-chemotherapy percutaneous biopsy and post-chemotherapy surgical  
513 samples from a prospective neoadjuvant breast cancer study. *Breast Cancer Research*. 2017;19(1):130.  
514
- 515 27. Contreras-Zárate MJ, Ormond DR, Gillen AE, Hanna C, Day NL, Serkova NJ, et al. Development of novel  
516 patient-derived xenografts from breast cancer brain metastases. *Frontiers in oncology*. 2017;7:252.  
517
- 518 28. Hoffmann J, Fichtner I, Lemm M, Lienau P, Hess-Stumpp H, Rotgeri A, et al. Sagopilone crosses the  
519 blood–brain barrier in vivo to inhibit brain tumor growth and metastases. *Neuro-oncology*.  
520 2009;11(2):158–166.  
521
- 522 29. Naumov GN, MacDonald IC, Weinmeister PM, Kerkvliet N, Nadkarni KV, Wilson SM, et al. Persistence  
523 of solitary mammary carcinoma cells in a secondary site: a possible contributor to dormancy. *Cancer*  
524 *research*. 2002;62(7):2162–2168.  
525
- 526 30. Shafie SM, Grantham FH. Role of hormones in the growth and regression of human breast cancer cells  
527 (MCF-7) transplanted into athymic nude mice. *Journal of the National Cancer Institute*. 1981;67(1):51–56.  
528
- 529 31. Murrell DH, Foster PJ, Chambers AF. Brain metastases from breast cancer: lessons from experimental  
530 magnetic resonance imaging studies and clinical implications. *Journal of molecular medicine*.  
531 2014;92(1):5–12.  
532
- 533 32. Foster-Gareau P, Heyn C, Alejski A, Rutt BK. Imaging single mammalian cells with a 1.5 T clinical MRI  
534 scanner. *Magnetic Resonance in Medicine: An Official Journal of the International Society for Magnetic*  
535 *Resonance in Medicine*. 2003;49(5):968–971.  
536
- 537 33. McFadden C, Mallett CL, Foster PJ. Labeling of multiple cell lines using a new iron oxide agent for cell  
538 tracking by MRI. *Contrast media & molecular imaging*. 2011;6(6):514–522.  
539
- 540 34. Makela AV, Murrell DH, Parkins KM, Kara J, Gaudet JM, Foster PJ. Cellular imaging with MRI. *Topics in*  
541 *Magnetic Resonance Imaging*. 2016;25(5):177–186.

- 542  
543  
544  
545  
546  
547  
548  
549  
550  
551  
552  
553  
554  
555  
556  
557  
558  
559  
560  
561  
562  
563  
564  
565  
566  
567  
568  
569  
570  
571  
572  
573  
574  
575  
576  
577  
578  
579  
580  
581  
582  
583  
584  
585  
586  
587  
588  
589
35. Heyn C, Ronald JA, Ramadan SS, Snir JA, Barry AM, MacKenzie LT, et al. In vivo MRI of cancer cell fate at the single-cell level in a mouse model of breast cancer metastasis to the brain. *Magnetic Resonance in Medicine: An Official Journal of the International Society for Magnetic Resonance in Medicine*. 2006;56(5):1001–1010.
  36. Murrell DH, Zarghami N, Jensen MD, Dickson F, Chambers AF, Wong E, et al. MRI surveillance of cancer cell fate in a brain metastasis model after early radiotherapy. *Magnetic resonance in medicine*. 2017;78(4):1506–1512.
  37. Economopoulos V, Chen Y, McFadden C, Foster PJ. MRI detection of nonproliferative tumor cells in lymph node metastases using iron oxide particles in a mouse model of breast cancer. *Translational oncology*. 2013;6(3):347.
  38. Basse P, Hokland P, Heron I, Hokland M. Fate of tumor cells injected into left ventricle of heart in BALB/c mice: role of natural killer cells. *JNCI: Journal of the National Cancer Institute*. 1988;80(9):657–665.
  39. Parkins KM, Hamilton AM, Makela AV, Chen Y, Foster PJ, Ronald JA. A multimodality imaging model to track viable breast cancer cells from single arrest to metastasis in the mouse brain. *Scientific reports*. 2016;6(1):1–9.
  40. Murrell DH, Hamilton AM, Mallett CL, van Gorkum R, Chambers AF, Foster PJ. Understanding heterogeneity and permeability of brain metastases in murine models of HER2-positive breast cancer through magnetic resonance imaging: implications for detection and therapy. *Translational oncology*. 2015;8(3):176–184.
  41. Hamilton AM, Parkins KM, Murrell DH, Ronald JA, Foster PJ. Investigating the impact of a primary tumor on metastasis and dormancy using MRI: new insights into the mechanism of concomitant tumor resistance. *Tomography*. 2016;2(2):79.
  42. Simpson-Abelson MR, Sonnenberg GF, Takita H, Yokota SJ, Conway TF, Kelleher RJ, et al. Long-term engraftment and expansion of tumor-derived memory T cells following the implantation of non-disrupted pieces of human lung tumor into NOD-scid IL2R $\gamma$ null mice. *The Journal of Immunology*. 2008;180(10):7009–7018.
  43. Agliano A, Martin-Padura I, Mancuso P, Marighetti P, Rabascio C, Pruneri G, et al. Human acute leukemia cells injected in NOD/LtSz-scid/IL-2R $\gamma$  null mice generate a faster and more efficient disease compared to other NOD/scid-related strains. *International journal of cancer*. 2008;123(9):2222–2227.
  44. Quintana E, Shackleton M, Sabel MS, Fullen DR, Johnson TM, Morrison SJ. Efficient tumour formation by single human melanoma cells. *Nature*. 2008;456(7222):593–598.
  45. Puchalapalli M, Zeng X, Mu L, Anderson A, Glickman LH, Zhang M, et al. NSG mice provide a better spontaneous model of breast cancer metastasis than athymic (nude) mice. *PLoS One*. 2016;11(9).
  46. Townson JL, Ramadan SS, Simeanea C, Rutt BK, MacDonald IC, Foster PJ, Chambers AF. Three-dimensional imaging and quantification of both solitary cells and metastases in whole mouse liver by magnetic resonance imaging. *Cancer research*. 2009 Nov 1;69(21):8326-31.

**Figure 1**

**A**

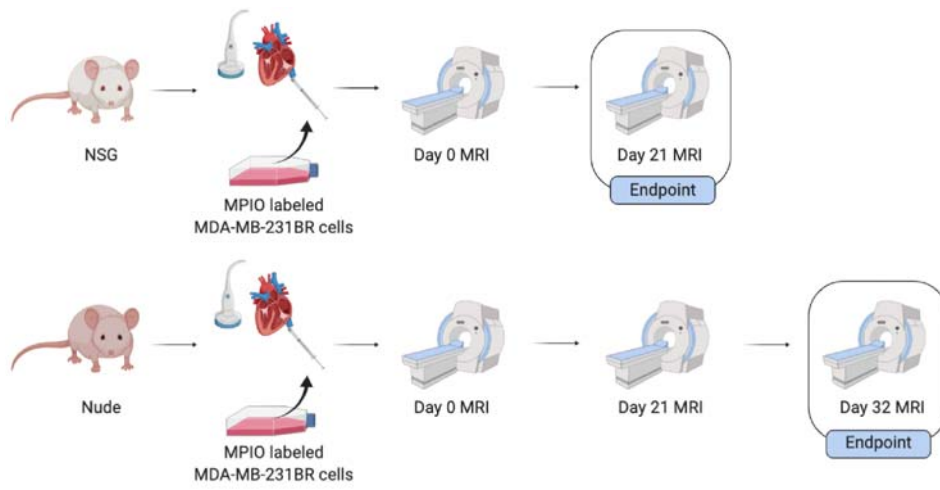

590

591 **Figure. 1 Experimental design for the NSG and nude mouse model**

**Figure 2**

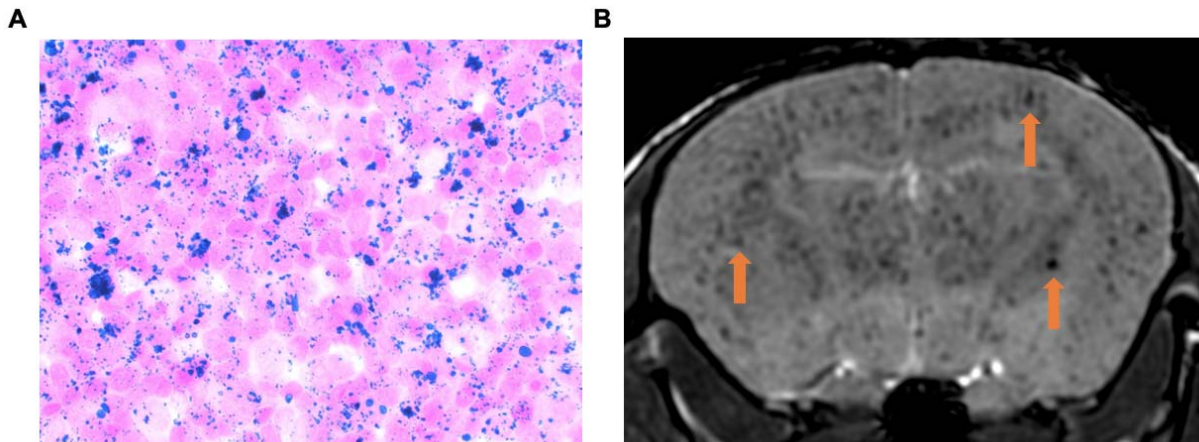

592

593 **Figure. 2 Iron labeling and injection of 231BR cells** (A) Perl's Prussian Blue stain showing intracellular iron  
594 (blue, PPB) detected within MDA-MB-231BR cells (pink, Nuclear fast red) *in vitro*. (B) Representative day 0 image  
595 showing visualization of successful iron-labeled cancer cell delivery by intracardiac injection as regions of signal  
596 void (orange arrows)

**Figure 3**

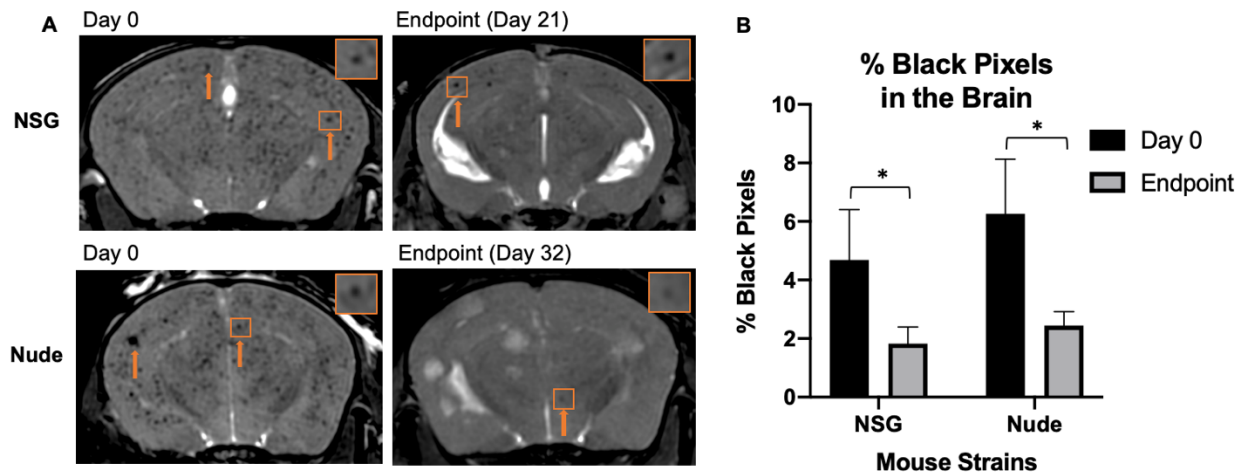

597

598 **Figure. 3 Cancer cell arrest and clearance** (A) Balanced steady-state free precession images showing initial

599 cancer cell arrest at day 0 and clearance and retention at endpoint. The orange arrows indicate regions of signal void.

600 (B) The percentage of black pixels, representing regions of signal void was not significantly different between

601 strains, however there was a significant decrease within strains from day 0 to endpoint, suggesting similar cancer

602 cell arrest and clearance between nude and NOD/SCID/IL2Irg<sup>-/-</sup> mice

Figure 4

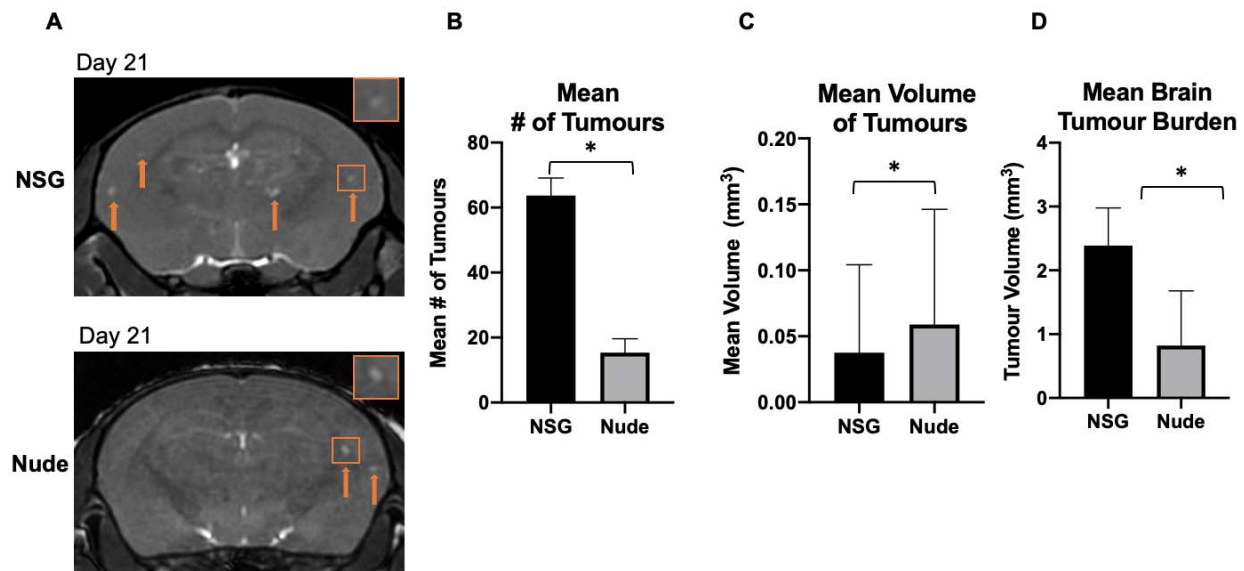

603

604 **Figure. 4 Day 21 visualization and quantification of brain metastases** (A) Balanced steady-state free precession

605 images showing brain metastases in both strains of mice as regions of signal hyperintensity (orange arrows) at day

606 21. (B) There were significantly more brain metastases on average detected with MRI in NSG mice than nude mice

607 at day 21. (C) The mean volume of tumors present in the brain was significantly greater in nude mice than NSGs.

608 (D) The brain tumor burden of NOD/SCID/IL2Rg<sup>-/-</sup> mice was significantly higher than in nude mice at day 21. Data

609 is presented as mean +/- SEM. \*indicates p < 0.05



Figure 5

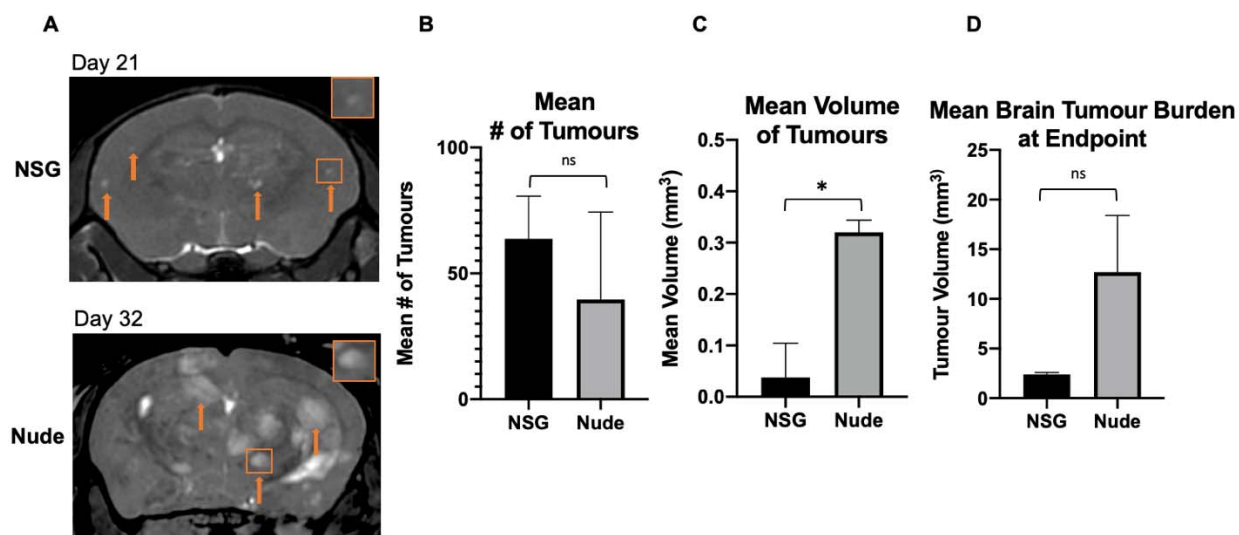

610  
611 **Figure. 5 Endpoint visualization and quantification of brain metastases** (A) Magnetic resonance images of both  
612 NOD/SCID/IL2rg<sup>-/-</sup> and nude mice at each strain's respective endpoints (Day 21 for NOD/SCID/IL2rg<sup>-/-</sup>, Day 32  
613 for nude) showing regions of signal hyperintensity where brain metastases have developed (orange arrows). (B)  
614 There was no significant difference between the number of brain metastases detected with magnetic resonance  
615 imaging between strains at endpoint. (C) The tumors in the nude mice were significantly larger in volume than those  
616 in the NOD/SCID/IL2rg<sup>-/-</sup> mice. (D) The total tumor burden within the brain at endpoint in both nude and mice was  
617 not significantly different. Data is presented as mean +/- SEM. \*indicates  $p < 0.05$

Figure 6

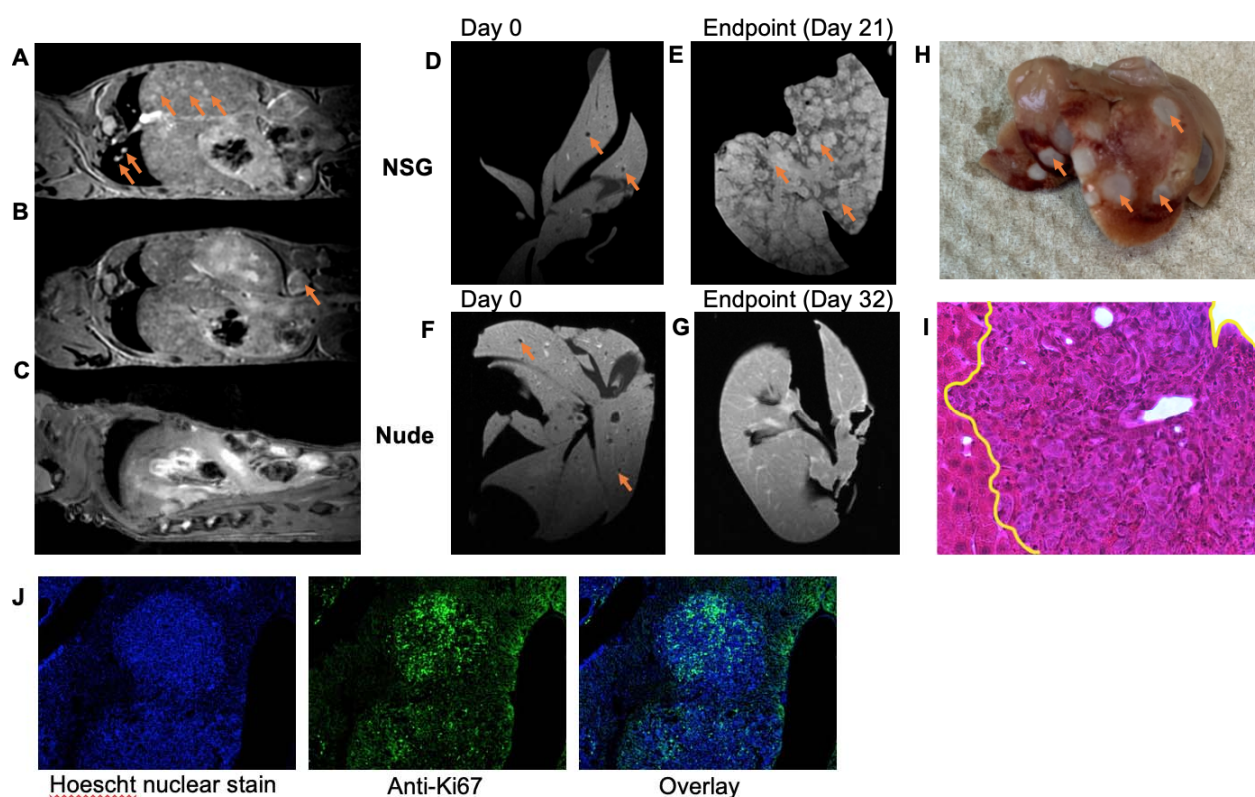

618  
619 **Figure. 6 Body and liver imaging with correlative histology and immunofluorescence** (A) Body imaging of  
620 NOD/SCID/IL2Rg<sup>-/-</sup> mouse allowed for detection of significant tumor burden in the liver, lungs. (B) Tumors were  
621 detected in the lymph nodes of NOD/SCID/IL2Rg<sup>-/-</sup> mice with magnetic resonance imaging. (C) No tumors were  
622 detected with magnetic resonance imaging in the nude mouse body. (D) Spoiled gradient echo sequence image  
623 showing initial arrest of cancer cells in *ex vivo* liver at Day 0 for NOD/SCID/IL2Rg<sup>-/-</sup> mouse (E) Spoiled gradient  
624 echo sequence image of *ex vivo* liver showing regions of hyperintensity where liver metastases have developed in  
625 the NOD/SCID/IL2Rg<sup>-/-</sup> mouse. (F) Day 0 spoiled gradient echo sequence image of *ex vivo* liver of from a nude  
626 mouse showing signal voids, representing arrested cancer cells. (G) Spoiled gradient echo sequence image of Day  
627 32 (endpoint) *ex vivo* liver of a nude mouse with no magnetic resonance detectable metastases (H) Photo of a  
628 representative *ex vivo* liver from an NOD/SCID/IL2Rg<sup>-/-</sup> mouse showing tumors on the exterior of the organ. (I)  
629 H&E-stained section showing liver metastases that had developed in the NOD/SCID/IL2Rg<sup>-/-</sup> mouse (outlined in  
630 yellow). (J) Ki67 staining showing a highly proliferative tumor within the NOD/SCID/IL2Rg<sup>-/-</sup> liver
